# Supplementary material
Source: PubMed Central journal article supplement (PMC3807425)
Supplement: JB.00860-13_zjb999092856so1.pdf [file JB.00860-13_zjb999092856so1.pdf]

1 **Supplemental material**

2

3 **The network of chromosomal and plasmid encoded genes for the adaptation of the**  
4 **marine bacterium *Dinoroseobacter shibae* to anaerobic conditions.**

5

6 Matthias Ebert<sup>1§</sup>, Sebastian Laaß<sup>1§</sup>, Melanie Burghartz<sup>1</sup>, Jörn Petersen<sup>2</sup>, Sebastian Koßmehl<sup>3</sup>,  
7 Lars Wöhlbrand<sup>3</sup>, Ralf Rabus<sup>3</sup>, Christoph Wittmann<sup>4</sup>, Petra Tielen<sup>1#</sup>, Dieter Jahn<sup>1</sup>

8

9 <sup>1</sup>Institute for Microbiology, Technische Universität Braunschweig, D-38106 Braunschweig,  
10 Germany

11 <sup>2</sup>Leibniz-Institut DSMZ-Deutsche Sammlung von Mikroorganismen und Zellkulturen GmbH,  
12 Inhoffenstraße 7 B, D-38124 Braunschweig, Germany

13 <sup>3</sup>Institut für Chemie und Biologie des Meeres, Carl von Ossietzky Universität Oldenburg,  
14 Carl-von-Ossietzky Str. 9-11, D-26111 Oldenburg

15 <sup>4</sup>Institute of Biochemical Engineering, Technische Universität Braunschweig, D-38106  
16 Braunschweig, Germany

17

18 <sup>§</sup>Authors contributed equally.

19

20 **Contents:**

21

22 1. Supplemental Results and Discussion

23 2. References Supplemental Tables

24 3. Supplemental Tables

25 Table S2

26 Table S3

27 4. Supplemental Figures

28 Figure S1

29

### 30 **Establishment of a mariner-based transposon system for *D. shibae***

31 In the initial step of our investigations it was necessary to define suitable parameters for the  
32 transfer of a transposon into the genome of *D. shibae*. First, the plasmid pBT20 encoding a  
33 mariner transposon was chosen (Fig. 1). It further harbors the C9 mariner transposase  
34 necessary for random recombination and transposon integration. The plasmid contains two  
35 origins of replication. The *oriT* from the broad host range plasmid pRK2 allows for  
36 conjugation into Gram-negative bacteria (1). With its origin of replication R6K $\gamma$  (IncX) the  
37 plasmid pBT20 can only be replicated in strains expressing *pir* (2). In *pir*-negative recipients  
38 like *D. shibae* the plasmid should behave like a suicide vector mediating plasmid loss and  
39 selection for integrated transposons as observed for other bacteria (1, 3). A corresponding  
40 procedure was established and systematically optimized to finally obtained  $9.0 \times 10^3$   
41 transposon mutants/per  $2.5 \times 10^8$  bacteria. Precultures of *D. shibae* DFL12<sup>T</sup> (acceptor strain)  
42 and *E. coli* ST18 (donor strain) were incubated under indicated different growth conditions. In  
43 the exponential growth phase, co-cultures of both strains were prepared in a volume ratio of  
44 10:1 of donor to acceptor strain. For this purpose *D. shibae* and *E. coli* ST18 cell cultures  
45 were mixed and sedimented together for 4 min (4000 x g). The supernatant was discarded and  
46 the cell material resuspended in hMB medium. Spots of the co-cultures were incubated for  
47 conjugation on hMB-agar plate supplemented with 50  $\mu$ g/ml aminolevulinic acid for 24 h at  
48 30 °C. The *D. shibae* DFL12<sup>T</sup> transposon-mutants were subsequently selected on hMB-agar  
49 plates supplemented with 80  $\mu$ g/ml gentamycin. For this purpose, serial dilutions of the  
50 conjugation cultures of  $10^{-1}$ - $10^{-7}$  were plated to maximize the efficiency. Single transposon  
51 mutants were isolated and preserved.

52

### 53 **Localization of the loci of transposon insertion in the DNA of *D. shibae***

54 For the localization of the integrated transposons in the chromosome or the plasmids of *D.*  
55 *shibae* an arbitrary PCR approach was used (1). This method allows the amplification of DNA

56 fragments consisting of 250 bp of the transposon DNA and a random length part from the  
57 genome or plasmids of *D. shibae* (Fig. 1a). The insertion loci were finally identified via DNA  
58 sequence determination of the arbitrary PCR products. Randomly selected mutants showed  
59 PCR products from 270 bp up to 2000 bp (Fig. 1b). The obtained DNA sequences for the  
60 various transposon integration sites indicated that no hot spots of integration were present.

61

### 62 **Selection of transposon mutants with an anaerobic growth phenotype**

63 The isolated 4500 *D. shibae* transposon mutants were screened for growth defects under  
64 anaerobic, denitrifying conditions. For 1580 out of 4500 tested mutants, the loci of integration  
65 were identified by DNA sequencing (Table S1, Supplemental Material). Residual transposon  
66 mutants are currently under investigation. Overall, 718 out of 1000 transposon mutants were  
67 in different genes. Assuming the presence of approximately 12% essential genes (4), which do  
68 not result in viable transposon mutants upon mutation, a saturation of 82% of the genome can  
69 be deducted. From the 4500 tested mutant strains 53 showed a decreased or even loss of  
70 growth under tested anaerobic conditions (Table 1). This suggests that approximately 1% of  
71 the genome of *D. shibae* was found essential or important for anaerobic growth. Besides  
72 insertion into the chromosome multiple insertions into the pDSHI01, pDSHI02, pDSHI03 and  
73 pDSHI04 were found. In total, *D. shibae* contains 5 plasmids, which are the 191 kb plasmid  
74 pDSHI01, the 153 kb plasmid pDSHI02, the 126 kb plasmid pDSHI03, the 86 kb plasmid  
75 pDSHI04 and the 72 kb plasmid pDSHI05 (5). In figure 1 of the results section the random  
76 distribution of transposon integration sites resulting in anaerobic growth defects of  
77 corresponding strains is shown. Three genes were hit twice by the transposon – *napA*  
78 encoding the nitrate reductase, the promotor region of the transposase gene *Dshi\_3356* and  
79 the plasmid encoded gene *Dshi\_3678/3874/4083*. For eight plasmid encoded genes the final  
80 identification of the loci of integration failed, because they exists as multiple copies on the

81 various plasmids of *D. shibae*. (5). Interestingly, no transposon insertion was found for  
82 plasmid pDSHI05 indicating that genes encoded by this plasmid do not play a role in  
83 anaerobic growth. As expected, accumulation of transposon integration sites was observed  
84 between region 3142258 to 3767137 bp of the *D. shibae* chromosome (Fig. 1). This region  
85 contains several known genes and operons involved in anaerobic metabolism (5).

86

### 87 **Genes essential for aerobic and anaerobic growth of *D. shibae***

88 Table 1 provides an overview over the functional categories for the genes for which the 53  
89 transposon mutants were isolated. These categories are described and discussed in the results  
90 section and here in the Supplemental Material. Only 5 of the obtained mutants showed a  
91 decreased growth under aerobic conditions indicating a general role for the *D. shibae* life  
92 cycle. For example, Dshi\_1643 encoding RecA, which is essential for the repair and  
93 maintenance of DNA, was disrupted by the transposon close to the end of the gene. Partial  
94 activity might be retained. Nevertheless, the significant decrease of growth under aerobic  
95 conditions and complete loss of growth under anaerobic conditions showed the general  
96 importance of this gene for *D. shibae*. Accordingly, when the *recA* gene was deleted in *E. coli*  
97 a growth rate decrease by 50 % was observed under anaerobic conditions compared to the  
98 wildtype (6).

99 A similar phenotype was observed for disrupted gene Dshi\_1932, encoding a putative  
100 glutathione-S-transferase. Glutathione S-transferase catalyzes the conjugation of the reduced  
101 tripeptide glutathione via the sulfhydryl groups to electrophilic substrates. In eukaryotes  
102 substrates are made soluble and accessible to detoxification this way. Multiple families of the  
103 enzyme catalyzing a broad variety of reactions were described (7). In contrast glutathione and  
104 the glutathione-S-transferase possess various controversially discussed functions in bacteria  
105 (8). They are involved in the protection against oxidative stress, in the maturation of proteins,

106 in the metabolism of aromatic compounds and in antibiotic resistance (9). Interestingly, the  
107 enzyme was also found in the periplasm contributing to redox processes, including disulfide  
108 bond formation (see results and below) and cytochrome c formation (10). Our findings  
109 underscore the importance of the enzyme for *D. shibae*, especially for anaerobic growth.

110

### 111 **Transcriptome and proteome of aerobically and anaerobically grown *D. shibae***

112 To identify anaerobically induced genes, transcriptome and proteome analyses were  
113 performed. For this purpose *D. shibae* DFL12<sup>T</sup> was cultivated in a chemostat using salt water  
114 medium (SWM) supplemented with 25 mM nitrate to sustain denitrification when oxygen  
115 became limited. After 20 h *D. shibae* reached the steady state with a constant cell density of  
116  $OD_{578} = 0.5 \pm 0.04$ . After 40 h of growth the aeration was switched off and the oxygen  
117 concentration in the culture decreased within 20 min to 0.05  $\mu$ M indicating microaerobic to  
118 anaerobic conditions. The corresponding transcriptome dataset revealed 474 genes which  
119 were differentially expressed by at least 1.74-fold when denitrifying and aerobic growth  
120 conditions were compared. Out of the 474 genes 207 were found induced and 267 showed a  
121 decreased expression. Proteome profiles were obtained via shot-gun analyses or inspection of  
122 the membrane protein-enriched fraction (both by means of nanoLC-ESI MS). The analyses  
123 detected 878 different proteins in the whole cell shot-gun approach and 1215 different  
124 proteins in the membrane fraction, which covered nearly 25 % of the predicted proteins of *D.*  
125 *shibae*. Results were compared with the results of the transposon mutagenesis (Table S2).

126

### 127 **General aspects of cytochrome c and disulfide bond formation**

128 Disulfide bond formation in bacteria occurs in the periplasm. Corresponding target proteins  
129 are secreted via the Sec-system into the periplasm. The disulfide bridges are then formed by  
130 the disulfide bond protein A (DsbA). Recycling of DsbA is performed by the inner membrane  
131 protein DsbB, which in turn transfers the electrons to various aerobic and anaerobic electron

132 transport chains of energy generation (11). DsbC (Dshi\_3082) is a protein disulfide  
133 isomerase, which corrects DsbA misfolds or introduces non conservative disulfides in  
134 periplasmic and outer membrane proteins like LptD (12-15). To fulfill its task DsbC is kept  
135 reduced in the periplasm by DsbD, an integral membrane protein of the inner membrane. Our  
136 study identified chromosomal *dsbC* and a plasmid encoded *dsbD* gene as essential for  
137 anaerobic growth. Both DsbC and DsbD were linked to cytochrome *c* biosynthesis and  
138 anaerobic metabolism before (16-18). In *E. coli* DsbA, DsbB and DsbD were found essential  
139 for anaerobic nitrate and nitrite respiration (17). In *Xanthomonas oryzae* DsbC was found  
140 essential for a pathogenesis in rice (19). In *Xylella*, DsbC is required for biofilm formation  
141 (20).

142 During cytochrome *c* maturation iron protoporphyrin IX is exported via the Ccm-system  
143 through the cytoplasmic membrane into the periplasm and covalently linked via disulfide  
144 bridges to an apoprotein (21). Three different machineries for cytochrome *c* formation  
145 (system I, II, III) are known. In *D. shibae* most likely analogously to *Rhodobacter capsulatus*  
146 (22) the apocytochrome protein gets translocated into periplasm via the Sec-system.  
147 Subsequently, DsbA/DsbB, most likely in cooperation with DsbC/DsbD catalyze the thio-  
148 oxireduction of the apocytochrome *c*. The Ccm machinery (CcmABCDEFGH) transports,  
149 chaperones, delivers and ligates the heme to the apocytochrome *c* (23). In this context, a  
150 *ccmH* (Dshi\_3777/4053) mutant abolished anaerobic growth of *D. shibae*. The CcmH protein  
151 is part of the CcmFHI heme ligation complex which forms the stereo-specific thioether bonds  
152 between the vinyl groups of the Fe-protoporphyrin IX and the thiol group of the  
153 apocytochrome *c* (24, 25). Interestingly, mutations of cysteine residues in the active site of *E.*  
154 *coli* CcmH inactivated the protein under aerobic but not anaerobic conditions (26). Clearly,  
155 different modes of cytochrome *c* generation exist for anaerobic and aerobic growth  
156 conditions.

157 *D. shibae* possesses *fixNOQP*- and *cycHJKL*-operons encoding *cbb*<sub>3</sub>-type cytochrome  
158 oxidases. *Cbb*<sub>3</sub>-type cytochrome oxidases have a high O<sub>2</sub>-affinity and are important for energy  
159 generation under microaerobic conditions (27). In *P. aeruginosa* it was shown that all of the  
160 here outlined cytochrome oxidases are essential for anaerobic growth. The isoforms fulfilled  
161 specialized roles under different oxygen tensions. They cannot complement for each other  
162 (28). However, in *D. shibae* mutation of *fixP* did not lead to an anaerobic phenotype. As  
163 expected the mutant with defect in the aerobic *caa*<sub>3</sub>-type cytochrome *c* oxidase subunit II  
164 encoding gene Dshi\_1140 was found without anaerobic growth phenotype. Accordingly, the  
165 expression of this gene was found decreased under anaerobic conditions (Table S2).

166

#### 167 **Electron donating systems for respiratory energy generation under anaerobic conditions**

168 Membrane localized NADH dehydrogenases serve as primary dehydrogenase of many  
169 electron transport chains. Different types of NADH dehydrogenases are known including type  
170 I proton translocating (Nuo), type II-non-ion translocating (Ndh) and type III-Na<sup>+</sup>-  
171 translocating. *D. shibae* possesses genes for all three types of NADH dehydrogenases. The  
172 operon encoding the main proton-translocating NADH dehydrogenase I  
173 *nuoABCDEFGHIJKLMN* is encoded by the genes Dshi\_1307-Dshi\_1329. A mutant defect in  
174 *nuoM* (Dshi\_1328) showed no anaerobic growth defect (Table S1) indicating a minor role of  
175 the proton-translocation NADH dehydrogenase Nuo for anaerobic energy generation.  
176 Accordingly, the transcription of *nuoM* was found unaffected by the switch from aerobic to  
177 anaerobic conditions (Table S2). The genes Dshi\_1390 and Dshi\_3590 encode two potential  
178 type II NADH dehydrogenases (Ndh). Expression of both genes was not influenced by  
179 oxygen tension. The *mnhABCDEFG* operon encodes the potential type III NADH  
180 dehydrogenase (Dshi\_0728-Dshi\_0734). The expression of the *mnhABCDEFG*-operon was  
181 found slightly decreased under conditions of oxygen depletion (Table S2). A second type III  
182 NADH dehydrogenase operon *phaACDEF* is located on the plasmid pDSHI02. The gene



183 *phaA* (Dshi\_3805) was found essential for the anaerobic growth of *D. shibae* (Table 1). The  
184 gene is part of the *phaACDEF* operon (Dshi\_3805-Dshi\_3810) encoding a Na<sup>+</sup>-translocating  
185 type III NADH dehydrogenase (NADH:quinone oxidoreductase). In accordance with its  
186 function the expression of the *phaACDEF* gene cluster was found enhanced under conditions  
187 of oxygen depletion. Currently, almost nothing is known about the function of the Pha-type  
188 NADH dehydrogenase. However, its essential anaerobic functions raises the question for the  
189 importance of Na<sup>+</sup>-dependent processes under anaerobic conditions in *D. shibae*.  
190 Mutations in other established primary dehydrogenases like glucose dehydrogenase (*gcd*,  
191 Dshi\_0476), formate dehydrogenase (*fdnG*, Dshi\_0504, *fdhD*, Dshi\_3282) and lactate  
192 dehydrogenase (*lldD2*, Dshi\_0948) did not yield an anaerobic phenotype (Table S2).  
193 Consequently these primary dehydrogenases are not essential for anaerobic growth.  
194 A mutant carrying a defect in gene Dshi\_0323, annotated to encode ferredoxin, with amino  
195 acid sequence homology to NapF was found unable to grow under oxygen limitation (Table  
196 1). Ferredoxins (EC 1.7.7.2) are iron-sulfur proteins that mediate electron transfer for a wide  
197 range of metabolic reactions. In several bacteria reduced ferredoxins function as electron  
198 donors during the reduction of nitrate to nitrite (29) or for the assimilatory reduction of nitrate  
199 to ammonium (30, 31). In agreement, only nitrate reduction was found essential for anaerobic  
200 growth. Here we add a Na<sup>+</sup>- translocating NADH dehydrogenase and a NapF-like ferredoxin  
201 to the essential components of the anaerobic electron transport chains.

202

### 203 **Adaptation of the central metabolism to anaerobic growth**

204 The Dshi\_1134 gene encodes 3-oxoacid CoA-transferase subunit B, which catalyzes the  
205 reaction of 3-oxoacids with succinyl-CoA to obtain activated 3-oxoacyl-CoA. Its exact  
206 function for anaerobic growth remains to be determined.

207 The two C<sub>4</sub>-dicarboxylate transporter genes *dctM1* (Dshi\_1037) and *dctM3* (Dshi\_3395) and a  
208 TRAP transporter solute receptor (Dshi\_1195) were inactivated during transposon

209 mutagenesis, causing an anaerobic growth phenotype. The first two genes are forming  
210 potential operons with *dctP*- and *dctQ*-type genes. Clearly, two tripartite ATP-independent  
211 periplasmic (TRAP) transporters for the uptake of succinate, the major carbon source of the  
212 used SWM medium, were hit (32). However, both potential operons were not found oxygen  
213 tension-regulated. Corresponding proteins were detected in our proteome analysis for aerobic  
214 and anaerobic growth conditions. In *P. aeruginosa* *dctPQM* was subject to catabolite  
215 repression via the *crc*-system (33). Their contribution to the anaerobic metabolism of *D.*  
216 *shibae* remains to be determined. The transposon mutant of Dshi\_3708 hit a gene encoding an  
217 AraC, helix-turn-helix domain containing, transcriptional regulator. The gene is localized  
218 downstream of the *dctPQM*-operon encoded by Dshi\_3711-3709. It was proposed that these  
219 transporters are high-affinity, Na<sup>+</sup>-dependent unidirectional secondary transporters (34, 35),  
220 again pointing towards an important function of Na<sup>+</sup>-dependent transport processes for  
221 anaerobic growth.

222 Surprisingly, only few enzymes of the central metabolism were found essential for anaerobic  
223 growth. Many enzymes of the citric cycle and fermentation can be eliminated by transposon  
224 mutagenesis without major consequences for aerobic or anaerobic growth. Other enzymes  
225 might be important for both life styles and therefore not be traceable via the mutagenesis  
226 approach. Only one of the pyruvate dehydrogenases was found essential for anaerobic growth.  
227 Again, evidence for the importance of Na<sup>+</sup> gradient-dependent processes was obtained.

228

### 229 **Proteases are involved in anaerobic growth of *D. shibae***

230 Four protease encoding genes for aminopeptidase N (Dshi\_1223), DNA binding, ATP-  
231 depending protease Lon (Dshi\_1777), the potential AAA-ATPase subunit of a Clp-type  
232 protease (Dshi\_1883) and a hemolysin type RTX (repeats-in-toxin) protein (Dshi\_3872) were  
233 identified with the transposon mutagenesis approach to be essential for anaerobic denitrifying  
234 growth (Table 1).

235 The gene Dshi\_1223 encodes the aminopeptidase PepN, which is involved in the degradation  
236 of the intracellular peptides generated by protein breakdown during the normal growth or in  
237 response to nutrient starvation and temperature stress (36, 37). PepN is also a negative  
238 regulator of sodium-salicylate-induced stress (37). Interestingly, *Vibrio fisheri*  
239 aminopeptidase N is essential for the colonization of the squid *Euprymna scolopes* (38).  
240 Analogously, *D. shibae* colonizes dinoflagellates.

241 The gene Dshi\_1883 encodes a putative ClpA/ClpB family protein. This type of ATP-  
242 dependent proteases plays a major role in the degradation of misfolded proteins and is  
243 induced in response to heat shock and many other stress signals (39-41). The gene Dshi\_1777  
244 encodes the Lon protease. Lon proteases degrade short-lived regulatory and abnormal proteins  
245 in presence of ATP (39). Lon proteases negatively control the acid resistance genes of *E. coli*  
246 (42), bacterial communication via quorum sensing (43, 44), motility via flagellar structures  
247 (45, 46), the SOS response to DNA damage (47, 48) and heme biosynthesis (49). The  
248 mutation of *lon* confers reduced pathogenicity/virulence to many bacteria, for example via  
249 regulation of type III secretion system (50, 51). Lon proteases activity is controlled by  
250 phospholipids, especially cardiolipin (52). Finally, Lon protease is essential for the anaerobic  
251 survival of *E. coli* during glucose starvation (53).

252 The gene Dshi\_3872 encodes a hemolysin-type calcium-binding region protein belonging to  
253 the RTX exoprotein family with similarity to the peptidase serralyisin (54). These proteins are  
254 exported across the bacterial envelope via a type I secretion system and contain glycine and  
255 aspartate rich repeats for Ca<sup>2+</sup> binding. The target of this protein, maybe the dinoflagellate,  
256 remains to be determined. A hemolysin-type transporter is cotranscribed with Dshi\_3873. The  
257 clear measurable decrease of growth of these mutants under anaerobic conditions compared to  
258 the wildtype indicated an important regulatory and restructuring effect of these proteases for  
259 the adaptation to anaerobiosis.

260

261 **Peptide transport is necessary for anaerobic growth**

262 The gene Dshi\_3796 encodes the ATP-binding protein OppD of an oligopeptide ABC  
263 transporter. The gene is obviously necessary for anaerobic growth of *D. shibae*. The *oppD*  
264 gene was not found differently expressed between aerobic and anaerobic conditions (Table 1  
265 and 2). Clearly, no peptides or amino acids are provided by the SWM medium. The Opp  
266 transporter was shown to be involved in the transport of small external signal peptides  
267 involved in cell-cell communication and intracellular regulation in *Enterococcus faecalis* and  
268 other Gram-positive bacteria (55). The use of signal peptides in Gram-negative bacteria is  
269 currently discussed. Their essential function to anaerobic growth in *D. shibae* remains to be  
270 determined.

271

272 **Restructuring of the cell envelope during anaerobic growth**

273 Several genes encoding enzymes involved in the restructuring of the cytoplasmic membrane,  
274 the cell wall and the lipopolysaccharide layer (LPS) of the outer membrane were found  
275 essential for anaerobic growth. The *alkB2* gene (Dshi\_0027) encodes an alkane-1-  
276 monooxygenase. It is an integral membrane di-iron enzyme which oxidases C<sub>12</sub> up to C<sub>20</sub> *n*-  
277 alkanes using molecular oxygen. Acyl lipid desaturases are members of this enzyme family.  
278 Differential gene expression for *alkB1* and *alkB2* genes from *P. aeruginosa* in dependence of  
279 the growth phase was described (56).

280 The *fadK* gene (Dshi\_3403) encodes a short chain acyl-CoA synthetase, which activates fatty  
281 acids via the ATP-dependent formation of a fatty acyl-CoA. The acyl-CoAs are central  
282 intermediates for fatty acid transport,  $\beta$ -oxidation or phospholipid biosynthesis. The *E. coli*  
283 *fadK* is maximally expressed under anaerobic conditions and repressed in the presence of  
284 oxygen (57). However, the expression of its *D. shibae fadK* counterpart was not responding  
285 to oxygen tension. One general explanation of our observations is the proven existence of two

286 distinct pathways for the  $\beta$ -oxidation of lipids under aerobic and anaerobic conditions in  
287 bacteria.

288 The gene Dshi\_0808 encodes MipA, a scaffolding protein essential to murein biosynthesis  
289 (58). Several proteins of cell wall formation are coordinated in their function via MipA  
290 interaction. The MipA protein was found essential for biofilm formation in *E. coli* and  
291 *Salmonella* (59, 60). The expression of the *mipA* gene in *E. coli* responded to the glucose  
292 concentration in the medium (61). Interestingly, the *mipA* gene of *E. coli* is regulated by NO  
293 via a cascade including the NO sensor NsrR, the alternative sigma factor E and the small  
294 RNA RybB (62) indicating its essential function in nitrate respiration. However, no  
295 differential *mipA* expression was observed for *D. shibae*.

296 The gene Dshi\_1766 encodes a LysM domain protein. The LysM domain is a binding motif  
297 for peptidoglycan (63). Obviously, this protein involved in the cell wall metabolism is  
298 essential for anaerobically growing *D. shibae*.

299 Finally, the glycosyl transferase gene Dshi\_3576 is forming at its genomic locus an operon  
300 with various genes involved in LPS biosynthesis. Changes in the LPS structure in response to  
301 anaerobic growth have been reported before (64, 65).

302 Obviously, the cell envelope composed of the inner membrane, the cell wall and the outer  
303 membrane with its LPS have to adapt to anaerobic growth conditions. Most likely we  
304 identified some of the essential players involved in these processes.

305

### 306 **Cation efflux proteins sustain anaerobic growth delay**

307 Transition metals are known to cause toxicity under anoxic conditions (66). The gene  
308 Dshi\_3624 encodes the cation efflux system CzcD. It was found induced under anaerobic  
309 conditions in *P. stutzeri* (67). It is known that transition metals interfere with the anaerobic  
310 metabolism and must be exported.

311

312 **The flagellar hook-length control protein FliK and nitrogen regulation**

313 The Dshi\_3364 gene encodes the flagellar hook-length control protein FliK. Besides its  
314 function in flagellar biosynthesis, the gene was important for biofilm development in  
315 *Shewanella oneidensis* (68). For *Campylobacter jejuni* modulation of the sigma 54-dependent  
316 regulon by the *fliK* locus was observed, including the regulation of the *nuo* genes for NADH  
317 dehydrogenase (69). Similar observations were made for *Helicobacter pylori*. Here, the FliK  
318 influenced the transcription of genes for a ferredoxin and thioredoxin (70). Obviously, the  
319 FliK protein mediates multiple regulatory functions besides its structural function during  
320 flagella formation. One of these functions is essential for anaerobic growth of *D. shibae* under  
321 anaerobic conditions.

## 322 Supplemental References

323

- 324 1. **O'Toole GA, Pratt LA, Watnick PI, Newman DK, Weaver VB, Kolter R.** 1999.  
325 Genetic approaches to study of biofilms. *Methods Enzymol.* **310**:91-109.
- 326 2. **Matsumoto-Mashimo C, Guerout AM, Mazel D.** 2004. A new family of conditional  
327 replicating plasmids and their cognate *Escherichia coli* host strains. *Res. Microbiol.*  
328 **155**:455-461.
- 329 3. **Herrero M, de Lorenzo V, Timmis KN.** 1990. Transposon vectors containing non-  
330 antibiotic resistance selection markers for cloning and stable chromosomal insertion of  
331 foreign genes in gram-negative bacteria. *J. Bacteriol.* **172**:6557-6567.
- 332 4. **Jacobs MA, Alwood A, Thaipisuttikul I, Spencer D, Haugen E, Ernst S, Will O,**  
333 **Kaul R, Raymond C, Levy R, Chun-Rong L, Guenther D, Bovee D, Olson MV,**  
334 **Manoil C.** 2003. Comprehensive transposon mutant library of *Pseudomonas*  
335 *aeruginosa*. *Proc. Natl. Acad. Sci. U S A.* **100**:14339-14344.
- 336 5. **Wagner-Döbler I, Ballhausen B, Berger M, Brinkhoff T, Buchholz I, Bunk B,**  
337 **Cypionka H, Daniel R, Drepper T, Gerds G, Hahnke S, Han C, Jahn D,**  
338 **Kalhoefer D, Kiss H, Klenk HP, Kyrpides N, Liebl W, Liesegang H, Meincke L,**  
339 **Pati A, Petersen J, Piekarski T, Pommerenke C, Pradella S, Pukall R, Rabus R,**  
340 **Stackebrandt E, Thole S, Thompson L, Tielen P, Tomasch J, von Jan M,**  
341 **Wanphrut N, Wichels A, Zech H, Simon M.** 2010. The complete genome sequence  
342 of the algal symbiont *Dinoroseobacter shibae*: a hitchhiker's guide to life in the sea.  
343 *ISME J.* **4**:61-77.
- 344 6. **Kouzminova EA, Rotman E, Macomber L, Zhang J, Kuzminov A.** 2004. RecA-  
345 dependent mutants in *Escherichia coli* reveal strategies to avoid chromosomal  
346 fragmentation. *Proc. Natl. Acad. Sci. U S A.* **101**:16262-16267.
- 347 7. **Board PG, Menon D.** 2013. Glutathione transferases, regulators of cellular  
348 metabolism and physiology. *Biochim. Biophys. Acta.* **1830**:3267-3288.
- 349 8. **Vuilleumier S.** 1997. Bacterial glutathione S-transferases: what are they good for? *J.*  
350 *Bacteriol.* **179**:1431-1441.
- 351 9. **Allocati N, Federici L, Masulli M, Di Ilio C.** 2012. Distribution of glutathione  
352 transferases in Gram-positive bacteria and Archaea. *Biochimie* **94**:588-596.
- 353 10. **Eser M, Masip L, Kadokura H, Georgiou G, Beckwith J.** 2009. Disulfide bond  
354 formation by exported glutaredoxin indicates glutathione's presence in the *E. coli*  
355 periplasm. *Proc. Natl. Acad. Sci. U S A.* **106**:1572-1577.
- 356 11. **Depuydt M, Messens J, Collet JF.** 2011. How proteins form disulfide bonds.  
357 *Antioxid. Redox. Signal.* **15**:49-66.
- 358 12. **Berkmen M, Boyd D, Beckwith J.** 2005. The nonconsecutive disulfide bond of  
359 *Escherichia coli* phytase (AppA) renders it dependent on the protein-disulfide  
360 isomerase, DsbC. *J. Biol. Chem.* **280**:11387-11394.
- 361 13. **Hiniker A, Bardwell JC.** 2004. In vivo substrate specificity of periplasmic disulfide  
362 oxidoreductases. *J. Biol. Chem.* **279**:12967-12973.
- 363 14. **Vertommen D, Depuydt M, Pan J, Leverrier P, Knoops L, Szikora JP, Messens J,**  
364 **Bardwell JC, Collet JF.** 2008. The disulphide isomerase DsbC cooperates with the  
365 oxidase DsbA in a DsbD-independent manner. *Mol. Microbiol.* **67**:336-349.
- 366 15. **Denoncin K, Vertommen D, Paek E, Collet JF.** 2010. The protein-disulfide  
367 isomerase DsbC cooperates with SurA and DsbA in the assembly of the essential beta-  
368 barrel protein LptD. *J. Biol. Chem.* **285**:29425-29433.

- 369 16. **Stirnimann CU, Rozhkova A, Grauschopf U, Grutter MG, Glockshuber R,**  
370 **Capitani G.** 2005. Structural basis and kinetics of DsbD-dependent cytochrome *c*  
371 maturation. *Structure* **13**:985-993.
- 372 17. **Metheringham R, Tyson KL, Croke H, Missiakas D, Raina S, Cole JA.** 1996.  
373 Effects of mutations in genes for proteins involved in disulphide bond formation in the  
374 periplasm on the activities of anaerobically induced electron transfer chains in  
375 *Escherichia coli* K12. *Mol. Gen. Genet.* **253**:95-102.
- 376 18. **Kumar P, Sannigrahi S, Scoullar J, Kahler CM, Tzeng YL.** 2011. Characterization  
377 of DsbD in *Neisseria meningitidis*. *Mol. Microbiol.* **79**:1557-1573.
- 378 19. **Guo W, Cui YP, Li YR, Che YZ, Yuan L, Zou LF, Zou HS, Chen GY.** 2012.  
379 Identification of seven *Xanthomonas oryzae* pv. *oryzicola* genes potentially involved  
380 in pathogenesis in rice. *Microbiology* **158**:505-518.
- 381 20. **Santos CA, Toledo MA, Trivella DB, Beloti LL, Schneider DR, Saraiva AM,**  
382 **Crucello A, Azzoni AR, Souza AA, Aparicio R, Souza AP.** 2012. Functional and  
383 structural studies of the disulfide isomerase DsbC from the plant pathogen *Xylella*  
384 *fastidiosa* reveals a redox-dependent oligomeric modulation in vitro. *FEBS J.*  
385 **279**:3828-3843.
- 386 21. **Sanders C, Turkarslan S, Lee DW, Daldal F.** 2010. Cytochrome *c* biogenesis: the  
387 Ccm system. *Trends Microbiol.* **18**:266-274.
- 388 22. **Ekici S, Pawlik G, Lohmeyer E, Koch HG, Daldal F.** 2012. Biogenesis of *cbb(3)-*  
389 *type* cytochrome *c* oxidase in *Rhodobacter capsulatus*. *Biochim. Biophys. Acta.*  
390 **1817**:898-910.
- 391 23. **Richard-Fogal CL, San Francisco B, Frawley ER, Kranz RG.** 2012. Thiol redox  
392 requirements and substrate specificities of recombinant cytochrome *c* assembly  
393 systems II and III. *Biochim. Biophys. Acta.* **1817**:911-919.
- 394 24. **Verissimo AF, Yang H, Wu X, Sanders C, Daldal F.** 2011. CcmI subunit of  
395 CcmFHI heme ligation complex functions as an apocytochrome *c* chaperone during *c-*  
396 *type* cytochrome maturation. *J. Biol. Chem.* **286**:40452-40463.
- 397 25. **Richard-Fogal CL, Frawley ER, Bonner ER, Zhu H, San Francisco B, Kranz RG.**  
398 2009. A conserved haem redox and trafficking pathway for cofactor attachment. *Embo*  
399 *J.* **28**:2349-2359.
- 400 26. **Robertson IB, Stevens JM, Ferguson SJ.** 2008. Dispensable residues in the active  
401 site of the cytochrome *c* biogenesis protein CcmH. *FEBS Lett.* **582**:3067-3072.
- 402 27. **Williams HD, Zlosnik JE, Ryall B.** 2007. Oxygen, cyanide and energy generation in  
403 the cystic fibrosis pathogen *Pseudomonas aeruginosa*. *Adv. Microb. Physiol.* **52**:1-71.
- 404 28. **Comolli JC, Donohue TJ.** 2004. Differences in two *Pseudomonas aeruginosa cbb3*  
405 cytochrome oxidases. *Mol. Microbiol.* **51**:1193-1203.
- 406 29. **Moreno-Vivian C, Cabello P, Martinez-Luque M, Blasco R, Castillo F.** 1999.  
407 Prokaryotic nitrate reduction: molecular properties and functional distinction among  
408 bacterial nitrate reductases. *J. Bacteriol.* **181**:6573-6584.
- 409 30. **Jepson BJ, Anderson LJ, Rubio LM, Taylor CJ, Butler CS, Flores E, Herrero A,**  
410 **Butt JN, Richardson DJ.** 2004. Tuning a nitrate reductase for function. The first  
411 spectropotentiometric characterization of a bacterial assimilatory nitrate reductase  
412 reveals novel redox properties. *J. Biol. Chem.* **279**:32212-32218.
- 413 31. **Fujinaga K, Taniguchi Y, Sun Y, Katayama S, Minami J, Matsushita O, Okabe**  
414 **A.** 1999. Analysis of genes involved in nitrate reduction in *Clostridium perfringens*.  
415 *Microbiology* **145 ( Pt 12)**:3377-3387.
- 416 32. **Forward JA, Behrendt MC, Wyborn NR, Cross R, Kelly DJ.** 1997. TRAP  
417 transporters: a new family of periplasmic solute transport systems encoded by the  
418 *dctPQM* genes of *Rhodobacter capsulatus* and by homologs in diverse gram-negative  
419 bacteria. *J. Bacteriol.* **179**:5482-5493.



- 420 33. **Valentini M, Lapouge K.** 2012. Catabolite repression in *Pseudomonas aeruginosa*  
421 PAO1 regulates the uptake of C(4) -dicarboxylates depending on succinate  
422 concentration. *Environ. Microbiol.*
- 423 34. **Mulligan C, Fischer M, Thomas GH.** 2011. Tripartite ATP-independent periplasmic  
424 (TRAP) transporters in bacteria and archaea. *FEMS Microbiol. Rev.* **35**:68-86.
- 425 35. **Mulligan C, Geertsma ER, Severi E, Kelly DJ, Poolman B, Thomas GH.** 2009.  
426 The substrate-binding protein imposes directionality on an electrochemical sodium  
427 gradient-driven TRAP transporter. *Proc. Natl. Acad. Sci. U S A.* **106**:1778-1783.
- 428 36. **Bhosale M, Kumar A, Das M, Bhaskarla C, Agarwal V, Nandi D.** 2013. Catalytic  
429 activity of Peptidase N is required for adaptation of *Escherichia coli* to nutritional  
430 downshift and high temperature stress. *Microbiol. Res.* **168**:56-64.
- 431 37. **Chandu D, Nandi D.** 2003. PepN is the major aminopeptidase in *Escherichia coli*:  
432 insights on substrate specificity and role during sodium-salicylate-induced stress.  
433 *Microbiology* **149**:3437-3447.
- 434 38. **Fidopiastis PM, Rader BA, Gerling DG, Gutierrez NA, Watkins KH, Frey MW,**  
435 **Nyholm SV, Whistler CA.** 2012. Characterization of a *Vibrio fischeri* aminopeptidase  
436 and evidence for its influence on an early stage of squid colonization. *J. Bacteriol.*  
437 **194**:3995-4002.
- 438 39. **Fu GK, Smith MJ, Markovitz DM.** 1997. Bacterial protease Lon is a site-specific  
439 DNA-binding protein. *J. Biol. Chem.* **272**:534-538.
- 440 40. **Van Melderen L, Aertsen A.** 2009. Regulation and quality control by Lon-dependent  
441 proteolysis. *Res. Microbiol.* **160**:645-651.
- 442 41. **Gottesman S.** 2003. Proteolysis in bacterial regulatory circuits. *Annu. Rev. Cell. Dev.*  
443 *Biol.* **19**:565-587.
- 444 42. **Heuveling J, Possling A, Hengge R.** 2008. A role for Lon protease in the control of  
445 the acid resistance genes of *Escherichia coli*. *Mol. Microbiol.* **69**:534-547.
- 446 43. **Bertani I, Rampioni G, Leoni L, Venturi V.** 2007. The *Pseudomonas putida* Lon  
447 protease is involved in N-acyl homoserine lactone quorum sensing regulation. *BMC*  
448 *Microbiol.* **7**:71.
- 449 44. **Takaya A, Tabuchi F, Tsuchiya H, Isogai E, Yamamoto T.** 2008. Negative  
450 regulation of quorum-sensing systems in *Pseudomonas aeruginosa* by ATP-dependent  
451 Lon protease. *J. Bacteriol.* **190**:4181-4188.
- 452 45. **Claret L, Hughes C.** 2000. Rapid turnover of FlhD and FlhC, the flagellar regulon  
453 transcriptional activator proteins, during *Proteus* swarming. *J. Bacteriol.* **182**:833-836.
- 454 46. **Tomoyasu T, Takaya A, Isogai E, Yamamoto T.** 2003. Turnover of FlhD and FlhC,  
455 master regulator proteins for *Salmonella flagellum* biogenesis, by the ATP-dependent  
456 ClpXP protease. *Mol. Microbiol.* **48**:443-452.
- 457 47. **Mizusawa S, Gottesman S.** 1983. Protein degradation in *Escherichia coli*: the *lon*  
458 gene controls the stability of Sula protein. *Proc. Natl. Acad. Sci. U S A.* **80**:358-362.
- 459 48. **Goodman MF.** 2000. Coping with replication 'train wrecks' in *Escherichia coli* using  
460 Pol V, Pol II and RecA proteins. *Trends Biochem. Sci.* **25**:189-195.
- 461 49. **Wang L, Elliott M, Elliott T.** 1999. Conditional stability of the HemA protein  
462 (glutamyl-tRNA reductase) regulates heme biosynthesis in *Salmonella typhimurium*. *J.*  
463 *Bacteriol.* **181**:1211-1219.
- 464 50. **Butler SM, Festa RA, Pearce MJ, Darwin KH.** 2006. Self-compartmentalized  
465 bacterial proteases and pathogenesis. *Mol. Microbiol.* **60**:553-562.
- 466 51. **Losada LC, Hutcheson SW.** 2005. Type III secretion chaperones of *Pseudomonas*  
467 *syringae* protect effectors from Lon-associated degradation. *Mol. Microbiol.* **55**:941-  
468 953.

- 469 52. **Minami N, Yasuda T, Ishii Y, Fujimori K, Amano F.** 2011. Regulatory role of  
470 cardiolipin in the activity of an ATP-dependent protease, Lon, from *Escherichia coli*.  
471 J. Biochem. **149**:519-527.
- 472 53. **Luo S, McNeill M, Myers TG, Hohman RJ, Levine RL.** 2008. Lon protease  
473 promotes survival of *Escherichia coli* during anaerobic glucose starvation. Arch.  
474 Microbiol. **189**:181-185.
- 475 54. **Linhartova I, Bumba L, Masin J, Basler M, Osicka R, Kamanova J, Prochazkova  
476 K, Adkins I, Hejnova-Holubova J, Sadilkova L, Morova J, Sebo P.** 2010. RTX  
477 proteins: a highly diverse family secreted by a common mechanism. FEMS Microbiol.  
478 Rev. **34**:1076-1112.
- 479 55. **Lazazzera BA.** 2001. The intracellular function of extracellular signaling peptides.  
480 Peptides **22**:1519-1527.
- 481 56. **Marin MM, Yuste L, Rojo F.** 2003. Differential expression of the components of the  
482 two alkane hydroxylases from *Pseudomonas aeruginosa*. J. Bacteriol. **185**:3232-3237.
- 483 57. **Morgan-Kiss RM, Cronan JE.** 2004. The *Escherichia coli fadK (ydiD)* gene encodes  
484 an anerobically regulated short chain acyl-CoA synthetase. J. Biol. Chem. **279**:37324-  
485 37333.
- 486 58. **Vollmer W, von Rechenberg M, Holtje JV.** 1999. Demonstration of molecular  
487 interactions between the murein polymerase PBP1B, the lytic transglycosylase MltA,  
488 and the scaffolding protein MipA of *Escherichia coli*. J. Biol. Chem. **274**:6726-6734.
- 489 59. **Rivas L, Fegan N, Dykes GA.** 2008. Expression and putative roles in attachment of  
490 outer membrane proteins of *Escherichia coli* O157 from planktonic and sessile  
491 culture. Foodborne Pathog. Dis. **5**:155-164.
- 492 60. **Giaouris E, Samoilis G, Chorianopoulos N, Ercolini D, Nychas GJ.** 2013.  
493 Differential protein expression patterns between planktonic and biofilm cells of  
494 *Salmonella enterica* serovar Enteritidis PT4 on stainless steel surface. Int. J. Food.  
495 Microbiol. **162**:105-113.
- 496 61. **Yang JN, Wang C, Guo C, Peng XX, Li H.** 2011. Outer membrane proteome and its  
497 regulation networks in response to glucose concentration changes in *Escherichia coli*.  
498 Mol. Biosyst. **7**:3087-3093.
- 499 62. **Thompson KM, Rhodius VA, Gottesman S.** 2007. SigmaE regulates and is  
500 regulated by a small RNA in *Escherichia coli*. J. Bacteriol. **189**:4243-4256.
- 501 63. **Buist G, Steen A, Kok J, Kuipers OP.** 2008. LysM, a widely distributed protein  
502 motif for binding to (peptido)glycans. Mol. Microbiol. **68**:838-847.
- 503 64. **Landini P, Zehnder AJ.** 2002. The global regulatory hns gene negatively affects  
504 adhesion to solid surfaces by anaerobically grown *Escherichia coli* by modulating  
505 expression of flagellar genes and lipopolysaccharide production. J. Bacteriol.  
506 **184**:1522-1529.
- 507 65. **Davies RL, Parton R, Coote JG, Gibbs HA, Freer JH.** 1992. Outer-membrane  
508 protein and lipopolysaccharide variation in *Pasteurella haemolytica* serotype A1 under  
509 different growth conditions. J. Gen. Microbiol. **138**:909-922.
- 510 66. **Bird LJ, Coleman ML, Newman DK.** 2013. Iron and copper act synergistically to  
511 delay anaerobic growth in bacteria. Appl. Environ. Microbiol.
- 512 67. **Yang Y, Zhu H, Colvin VL, Alvarez PJ.** 2011. Cellular and transcriptional response  
513 of *Pseudomonas stutzeri* to quantum dots under aerobic and denitrifying conditions.  
514 Environ. Sci. Technol. **45**:4988-4994.
- 515 68. **Thormann KM, Saville RM, Shukla S, Pelletier DA, Spormann AM.** 2004. Initial  
516 Phases of biofilm formation in *Shewanella oneidensis* MR-1. J. Bacteriol. **186**:8096-  
517 8104.
- 518 69. **Kamal N, Dorrell N, Jagannathan A, Turner SM, Constantinidou C, Studholme  
519 DJ, Marsden G, Hinds J, Laing KG, Wren BW, Penn CW.** 2007. Deletion of a

520 previously uncharacterized flagellar-hook-length control gene *fliK* modulates the  
521  $\sigma^{54}$ -dependent regulon in *Campylobacter jejuni*. *Microbiology* **153**:3099-3111.  
522 70. **Douillard FP, Ryan KA, Hinds J, O'Toole PW.** 2009. Effect of *FliK* mutation on  
523 the transcriptional activity of the  $\sigma^{54}$  sigma factor RpoN in *Helicobacter*  
524 *pylori*. *Microbiology* **155**:1901-1911.  
525

526 **Fig. S1: Experimental approach of transposon mutagenesis and insertion site**  
527 **localization.** The structure of the employed mariner transposon carrying plasmid pBT20 is  
528 depicted (a). Below the strategy of arbitrary PCR approach is shown (b). Arrows represent the  
529 annealing location and orientation of the used primers. The first PCR-round contained primers  
530 1, 2 and 3. The second PCR-round included primers 4 and 5 (modified after O'Toole *et al.*,  
531 1999). Analysis of arbitrary PCR products. Obtained PCR products were separated by agarose  
532 gel electrophoreses and visualized by ethidium bromid staining. Shown are the used marker  
533 and lanes 1 to 15 display the PCR products from different *D. shibae* DFL12<sup>T</sup> transposon  
534 mutants. For more information also see the Supplemental Material Table: S1  
535

536 Fig. S1

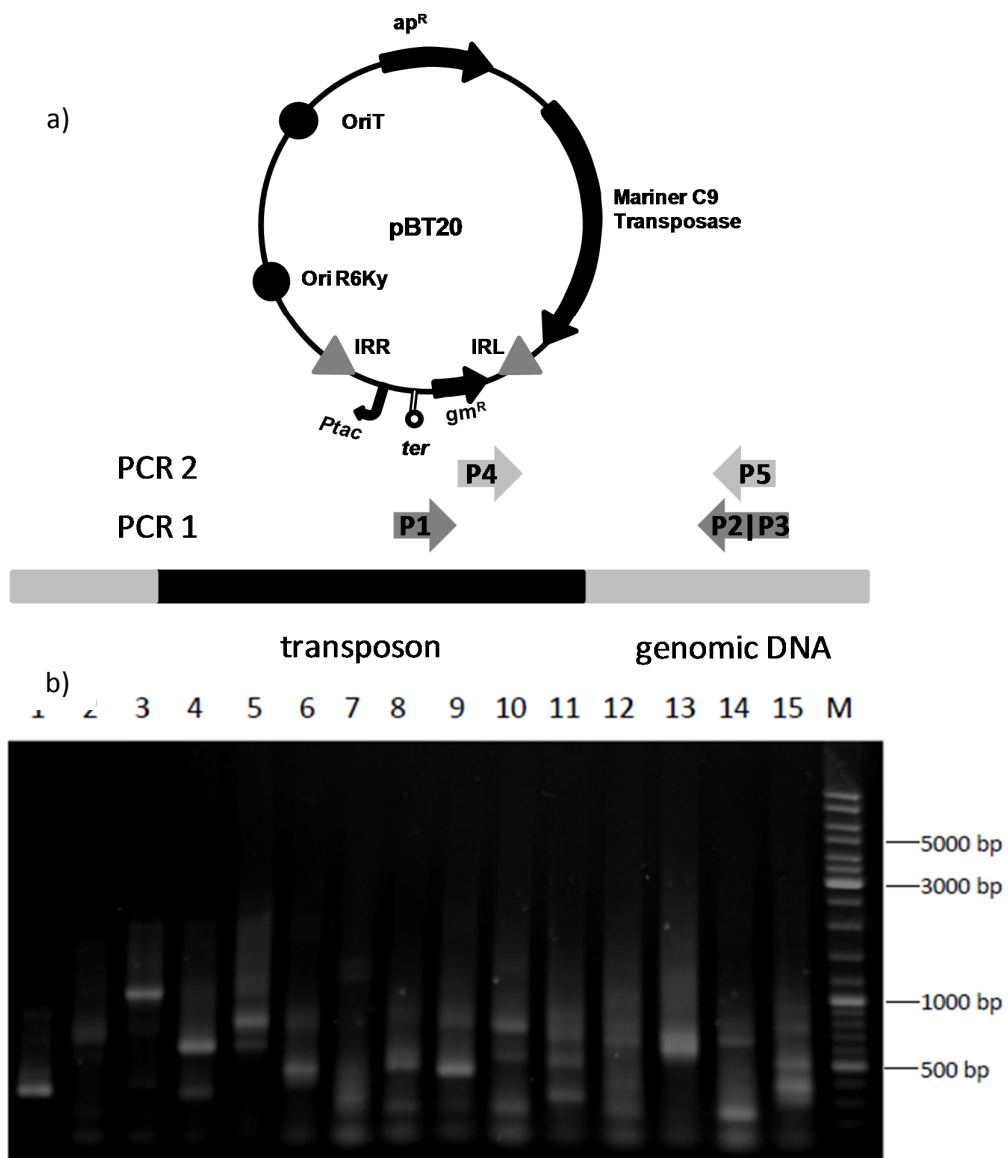

transposon AACCTGTTA-TTACGTGCAGAAG Dshi\_3165

537

538

539

540

541

542

543 Table S2: Transcriptional profiling of gene classes including essential genes for anaerobic  
544 growth. Maximal fold change of gene expression within 2 h of oxygen depletion and presence  
545 of cytoplasmic and membrane proteins under anaerobic, denitrifying conditions. (o) not  
546 detected, (+) detected

| Locus tag                         | Gene name    | Function of the gene product                               | Fold change/Detection |         |   |
|-----------------------------------|--------------|------------------------------------------------------------|-----------------------|---------|---|
|                                   |              |                                                            | Transcript anaerob    | Protein |   |
|                                   |              |                                                            | aerob                 | anaerob |   |
| <b>Denitrification</b>            |              |                                                            |                       |         |   |
| Dshi_3161                         | <i>napC</i>  | NapC/NirT cytochrome <i>c</i> domain-containing protein    | 2.9                   | o       | + |
| Dshi_3162                         | <i>napB</i>  | Nitrate reductase cytochrome <i>c</i> -type subunit (NapB) | 2.5                   | o       | + |
| Dshi_3163                         | <i>napH</i>  | Quinol dehydrogenase membrane component                    | 3.2                   | o       | o |
| Dshi_3164                         | <i>napG</i>  | NapG family ferredoxin-type protein                        | 3.0                   | o       | o |
| Dshi_3165                         | <i>napA</i>  | Nitrate reductase catalytic subunit                        | 4.4                   | +       | + |
| Dshi_3166                         | <i>napD</i>  | NapD family protein                                        | 3.6                   | o       | o |
| Dshi_3167                         | <i>napF</i>  | Ferredoxin-type protein NapF                               | 1.4                   | o       | o |
| Dshi_1667                         | <i>nasD</i>  | Nitrite reductase (NAD(P)H), large subunit                 | 1.2                   | o       | o |
| Dshi_1668                         | <i>nasE</i>  | Nitrite reductase (NAD(P)H), small subunit                 | 1.1                   | o       | o |
| Dshi_1669                         | <i>nasA</i>  | Molybdopterin oxidoreductase                               | -1.0                  | o       | o |
| Dshi_1670                         |              | Hypothetical protein                                       | 1.0                   | o       | o |
| Dshi_1671                         | <i>cysG</i>  | Uroporphyrin-III C-methyltransferase                       | 1.1                   | o       | o |
| Dshi_0323                         |              | Ferredoxin                                                 | -1.3                  | o       | o |
| Dshi_0540                         |              | NnrU family protein                                        | 1.8                   | +       | + |
| Dshi_3180                         | <i>nirS</i>  | Nitrite reductase precursor                                | 31.6                  | o       | + |
| Dshi_3181                         | <i>nosR2</i> | Nitrous oxide reductase regulatory protein NosR            | 13.0                  | o       | + |
| Dshi_3192                         |              | Hypothetical protein                                       | 14.2                  | o       | o |
| Dshi_3195                         | <i>nosD</i>  | Nitrous oxide maturation protein                           | 12.8                  | o       | o |
| <b>Molybdopterin biosynthesis</b> |              |                                                            |                       |         |   |
| Dshi_2974                         | <i>moeB</i>  | Molybdopterin biosynthesis protein                         | 1.1                   | o       | + |
| Dshi_3089                         | <i>moaB</i>  | Molybdopterin binding domain                               | -1.1                  | +       | + |
| Dshi_1290                         | <i>moaA</i>  | Molybdenum cofactor biosynthesis protein A                 | -1.4                  | +       | + |
| Dshi_3482                         | <i>modB</i>  | Molybdenum transport system permease protein ModB          | -1.1                  | o       | o |

|                                                  |              |                                                                            |      |   |   |
|--------------------------------------------------|--------------|----------------------------------------------------------------------------|------|---|---|
| Dshi_3483                                        | <i>modC</i>  | Molybdenum import ATP-binding protein ModC                                 | -1.1 | o | o |
| <b>Cytochromes <i>c</i> and its biosynthesis</b> |              |                                                                            |      |   |   |
| Dshi_0508                                        |              | Cytochrome <i>c</i> class I                                                | -1.2 | o | o |
| Dshi_1932                                        |              | Glutathione S-transferase                                                  | -1.8 | o | o |
| Dshi_2081                                        |              | Putative cytochrome <i>c</i>                                               | -2.5 | o | o |
| Dshi_2868                                        |              | Cytochrome <i>c</i>                                                        | -1.6 | o | o |
| Dshi_3082                                        | <i>dsbC</i>  | Putative <i>C</i> -type cytochrome biosynthesis protein                    | -1.2 | o | o |
| Dshi_3407                                        | <i>dsbD</i>  | Thiol:disulfide interchange protein DsbD                                   | 1.4  | + | + |
| Dshi_3606                                        |              | Cytochrome <i>c</i> biogenesis protein                                     | -1.0 | o | o |
| Dshi_3944                                        |              | transmembrane region                                                       |      |   |   |
| Dshi_3620                                        | <i>dsbA1</i> | DSBA oxidoreductase                                                        | -1.5 | + | + |
| Dshi_3621                                        | <i>dsbB</i>  | Disulfide bond formation protein                                           | -1.2 | o | o |
| Dshi_3775                                        | <i>ccmF</i>  | Cytochrome <i>c</i> -type biogenesis protein CcmF                          | -1.2 | o | + |
| Dshi_3776                                        | <i>ccmG</i>  | Periplasmic protein thiol disulphide oxidoreductase DsbE                   | 1.0  | + | + |
| Dshi_3777                                        |              | Cytochrome <i>c</i> biogenesis protein                                     | -1.1 | + | + |
| Dshi_4053                                        | <i>ccmH</i>  |                                                                            |      |   |   |
| Dshi_3778                                        | <i>ccmI</i>  | TPR repeat-containing protein                                              | -1.1 | + | + |
| Dshi_3779                                        | <i>dsbD</i>  | Thiol:disulfide interchange protein DsbD precursor                         | 1.3  | o | o |
| Dshi_3887                                        | <i>cccA</i>  | Cytochrome <i>c</i> class I                                                | 1.2  | o | o |
| Dshi_3894                                        |              | Cytochrome <i>c</i>                                                        | 1.2  | o | o |
| <b>Anaerobic electron transport chain</b>        |              |                                                                            |      |   |   |
| Dshi_0451                                        | <i>pqqB</i>  | Coenzyme PQQ biosynthesis protein B                                        | -1.6 | o | o |
| Dshi_0452                                        | <i>pqqC</i>  | Coenzyme PQQ biosynthesis protein C                                        | -1.6 | o | o |
| Dshi_0473                                        |              | Alcohol dehydrogenase class III/S-(hydroxymethyl)glutathione dehydrogenase | -1.5 | o | o |
| Dshi_0476                                        | <i>gcd</i>   | Quinoprotein glucose dehydrogenase                                         | -2.1 | + | + |
| Dshi_0504                                        | <i>fdnG</i>  | Formate dehydrogenase alpha chain                                          | -1.9 | + | + |
| Dshi_0664                                        | <i>fixP</i>  | Cytochrome <i>c</i> oxidase                                                | 5.7  | + | + |
| Dshi_0728                                        | <i>mnhA</i>  | NADH dehydrogenase (quinone)                                               | -1.1 | o | o |
| Dshi_0729                                        | <i>mnhB</i>  | Na <sup>+</sup> /H <sup>+</sup> antiporter MnhB subunit-related protein    | -1.1 | o | o |
| Dshi_0730                                        | <i>mnhC</i>  | Putative monovalent cation/H <sup>+</sup> antiporter subunit C             | -1.1 | o | o |
| Dshi_0731                                        | <i>mnhD</i>  | NADH dehydrogenase (quinone)                                               | -1.1 | o | o |
| Dshi_0732                                        | <i>mnhE</i>  | Cation antiporter                                                          | -1.1 | o | o |
| Dshi_0733                                        | <i>mnhF</i>  | Multiple resistance and pH regulation                                      | -1.2 | o | o |

|                           |              |                                                                                 |      |   |   |
|---------------------------|--------------|---------------------------------------------------------------------------------|------|---|---|
| protein F                 |              |                                                                                 |      |   |   |
| Dshi_0734                 | <i>mnhG</i>  | Monovalent cation/proton antiporter, MnhG subunit                               | -1.0 | o | o |
| Dshi_0948                 | <i>lldD2</i> | L-lactate dehydrogenase                                                         | 1.2  | + | o |
| Dshi_1140                 |              | Cytochrome c oxidase subunit II                                                 | -4.2 | + | + |
| Dshi_1144                 | <i>ctaE</i>  | Cytochrome c oxidase subunit II                                                 | -2.9 | o | o |
| Dshi_1281                 | <i>fdhB</i>  | Respiratory-chain NADH dehydrogenase domain                                     | 1.2  | o | o |
| Dshi_1282                 | <i>fdhA</i>  | Complex with <i>fdhB</i> , Molybdopterine oxidoreductase, contains Fe-S cluster | 1.0  | o | o |
| Dshi_1328                 | <i>nuoM</i>  | Proton-translocation NADH-quinone oxidoreductase                                | 1.3  | + | + |
| Dshi_1954                 |              | putative short-chain dehydrogenase                                              | -1.1 | + | o |
| Dshi_2278                 | <i>dmsA</i>  | Dimethyl sulfoxide reductase precursor                                          | 11.7 | o | o |
| Dshi_3324                 | <i>dld2</i>  | D-lactate dehydrogenase                                                         | 1.0  | o | o |
| Dshi_3590                 |              | Ubiquinone dependent NADH dehydrogenase                                         | 2.1  | + | + |
| Dshi_3805                 | <i>phaA</i>  | NADH dehydrogenase                                                              | 2.0  | + | + |
| Dshi_3806                 | <i>phaC</i>  | Putative monovalent cation/H <sup>+</sup> antiporter subunit                    | 1.2  | + | + |
| Dshi_3807                 | <i>phaD</i>  | Putative monovalent cation/H <sup>+</sup> antiporter subunit                    | 1.2  | + | + |
| Dshi_3808                 | <i>phaE</i>  | Putative monovalent cation/H <sup>+</sup> antiporter subunit                    | 1.1  | o | o |
| Dshi_3809                 | <i>phaF</i>  | Multiple resistance and pH regulation protein                                   | 1.3  | o | + |
| Dshi_3810                 | <i>phaG</i>  | Monovalent cation/proton antiporter, PhaG subunit                               | 1.3  | o | o |
| <b>Photosynthesis</b>     |              |                                                                                 |      |   |   |
| Dshi_3524                 | <i>pufM</i>  | Reaction center protein M chain                                                 | -1.1 | + | + |
| Dshi_3525                 | <i>pufC</i>  | Photosynthetic reaction center cytochrome c subunit precursor                   | -1.1 | + | + |
| Dshi_3544                 | <i>acsF</i>  | Aerobic magnesium-protoporphyrin IX monomethyl ester                            | 1.0  | + | + |
| <b>Fermentation</b>       |              |                                                                                 |      |   |   |
| Dshi_0432                 | <i>arcA</i>  | Arginine deminase                                                               | 2.5  | o | o |
| Dshi_1825                 | <i>pta1</i>  | Phosphate acetyl transferase                                                    | 1.0  | o | o |
| Dshi_3553                 | <i>Acs</i>   | Acetyl-coenzym A synthetase                                                     | 1.8  | + | + |
| <b>Central metabolism</b> |              |                                                                                 |      |   |   |
| Dshi_0535                 | <i>pdhB1</i> | Pyruvate dehydrogenase E1 component subunit beta                                | -1.5 | o | + |
| Dshi_1227                 | <i>glcB</i>  | Malate synthase G                                                               | -2.1 | o | o |
| Dshi_1966                 | <i>lpdA</i>  | Dihydrolipoyl dehydrogenase                                                     | 1.3  | + | + |



|                                                              |              |                                                              |      |   |   |
|--------------------------------------------------------------|--------------|--------------------------------------------------------------|------|---|---|
| Dshi_1968                                                    | <i>aceE</i>  | Pyruvate dehydrogenase E1 component                          | 3.0  | o | + |
| Dshi_2158                                                    | <i>pdhA1</i> | Pyruvate dehydrogenase (acetyl-transferring)                 | -1.1 | + | + |
| Dshi_2159                                                    | <i>pdhB2</i> | Pyruvate dehydrogenase subunit beta                          | -1.9 | + | + |
| Dshi_2160                                                    | <i>pdhC1</i> | Branched-chain alpha-keto acid dehydrogenase subunit E2      | -2.4 | + | + |
| Dshi_2485                                                    | <i>pyc</i>   | Pyruvate carboxylase                                         | -1.1 | + | + |
| Dshi_2490                                                    | <i>citE1</i> | Citrate lyase                                                | -1.7 | o | o |
| Dshi_2491                                                    | <i>sucC2</i> | Succinyl-CoA synthetase                                      | -2.3 | o | o |
| Dshi_2876                                                    | <i>mdh</i>   | Malate dehydrogenase                                         | 1.1  | + | + |
| <b>Potential Na<sup>+</sup>-dependent membrane processes</b> |              |                                                              |      |   |   |
| Dshi_0699                                                    | <i>dctM1</i> | TRAP dicarboxylate transporter, DctM subunit                 | -1.1 | o | o |
| Dshi_0743                                                    | <i>mcsS</i>  | MscS mechanosensitive ion channel                            | 1.1  | o | o |
| Dshi_1035                                                    | <i>dctP</i>  | TRAP dicarboxylate transporter- DctP subunit                 | -1.9 | o | o |
| Dshi_1036                                                    | <i>dctQ</i>  | Tripartite ATP-independent periplasmic transporter DctQ      | -1.6 | + | + |
| Dshi_1037                                                    | <i>dctM1</i> | TRAP dicarboxylate transporter, DctM subunit                 | -1.4 | o | o |
| Dshi_1709                                                    | <i>mcsS</i>  | MscS mechanosensitive ion channel                            | -1.4 | + | + |
| Dshi_1816                                                    | <i>mcsS</i>  | MscS mechanosensitive ion channel                            | 1.1  | o | + |
| Dshi_2998                                                    | <i>mcsS</i>  | MscS mechanosensitive ion channel                            | -1.3 | + | + |
| Dshi_3326                                                    | <i>dctP3</i> | TRAP dicarboxylate transporter- DctP subunit                 | -2.1 | + | + |
| Dshi_3328                                                    | <i>dctM4</i> | TRAP dicarboxylate transporter, DctM subunit                 | -1.4 | o | o |
| Dshi_3395                                                    | <i>dctM3</i> | TRAP C4-dicarboxylate transport system permease DctM subunit | -1.3 | o | o |
| Dshi_3396                                                    | <i>dctQ</i>  | Tripartite ATP-independent periplasmic transporter DctQ      | -1.6 | o | + |
| Dshi_3397                                                    | <i>dctP</i>  | TRAP dicarboxylate transporter- DctP subunit                 | -1.8 | + | + |
| Dshi_3905                                                    | <i>mcsS</i>  | MscS mechanosensitive ion channel                            | 1.2  | + | o |
| Dshi_4182                                                    | <i>mcsS</i>  | MscS mechanosensitive ion channel                            | 1.1  | o | o |
| <b>Peptidases and peptide transporters</b>                   |              |                                                              |      |   |   |
| Dshi_0655                                                    | <i>oppA</i>  | ABC peptide transporter                                      | -1.1 | + | + |
| Dshi_0658                                                    | <i>oppDF</i> | ABC peptide transporter                                      | -1.2 | + | + |
| Dshi_0841                                                    |              | Hypothetical protein                                         | -1.3 | o | o |
| Dshi_1223                                                    | <i>pepN</i>  | Aminopeptidase N                                             | 1.1  | o | o |
| Dshi_1777                                                    |              | ATP-dependent protease                                       | -1.0 | + | + |
| Dshi_1883                                                    |              | Putative ClpA/ClpB family protein                            | -1.4 | + | + |
| Dshi_3624                                                    |              | Co/Zn/Cd efflux system component                             | 1.1  | o | o |

|                                                                           |              |                                                                |      |   |   |
|---------------------------------------------------------------------------|--------------|----------------------------------------------------------------|------|---|---|
| Dshi_3962                                                                 |              |                                                                |      |   |   |
| Dshi_3626                                                                 |              | Co/Zn/Cd resistance protein                                    | -1.0 | o | o |
| Dshi_3964                                                                 |              |                                                                |      |   |   |
| Dshi_3625                                                                 |              | Hypothetical protein                                           | -1.1 | o | o |
| Dshi_3963                                                                 |              |                                                                |      |   |   |
| Dshi_3796                                                                 | <i>oppD</i>  | ABC transporter (importer)<br>ATP-binding protein              | -1.1 | o | o |
| <b>Phages, transposons, insertion elements, DNA restructuring enzymes</b> |              |                                                                |      |   |   |
| Dshi_1643                                                                 | <i>recA</i>  | Bacterial DNA recombination                                    | -1.1 | + | + |
| Dshi_2174                                                                 |              | Putative phage capsid protein                                  | 1.0  | + | + |
| Dshi_2177                                                                 |              | Phage portal protein, HK97 family                              | 1.2  | o | o |
| Dshi_3758                                                                 |              | Transposase                                                    | -1.1 | o | o |
| Dshi_4034                                                                 |              |                                                                |      |   |   |
| Dshi_3679                                                                 |              | Integrase catalytic region (transposase)                       | 1.2  | o | o |
| Dshi_3875                                                                 |              |                                                                |      |   |   |
| Dshi_4082                                                                 |              |                                                                |      |   |   |
| Dshi_3678                                                                 |              | ATP-binding protein,                                           |      |   |   |
| Dshi_3874                                                                 |              | putative transposase                                           | 1.1  | o | o |
| Dshi_4083                                                                 |              |                                                                |      |   |   |
| Dshi_3678                                                                 |              | ATP-binding protein,                                           |      |   |   |
| Dshi_3874                                                                 |              | putative transposase                                           | 1.1  | o | o |
| Dshi_4083                                                                 |              |                                                                |      |   |   |
| Dshi_4023                                                                 | <i>repA</i>  | Regulator protein RepA                                         | -1.4 | + | + |
| <b>Cell envelope</b>                                                      |              |                                                                |      |   |   |
| Dshi_0027                                                                 | <i>alkB1</i> | Fatty acid desaturase                                          | -1.0 | o | o |
| Dshi_0543                                                                 |              | Na <sup>+</sup> /P <sub>i</sub> -cotransporter                 | 3.5  | o | o |
| Dshi_0750                                                                 |              | Conserved hypothetical protein                                 | -1.4 | + | + |
| Dshi_0808                                                                 | <i>mipA</i>  | Membrane bound transglycosylase and penicillin-binding protein | 1.0  | + | + |
| Dshi_1134                                                                 |              | 3-Oxo acid-CoA-transferase (B subunit)                         | -1.7 | + | + |
| Dshi_1277                                                                 |              | Hypothetical protein                                           | -1.0 | o | o |
| Dshi_1766                                                                 | <i>lysM</i>  | Pepidoglycan-binding protein LysM                              | 1.0  | + | + |
| Dshi_2238                                                                 |              | Periplasmic binding protein/LacI transcriptional regulator     | -1.0 | o | o |
| Dshi_2312                                                                 |              | Type I restriction-modification system (R subunit)             | 1.2  | o | o |
| Dshi_2726                                                                 |              | Hypothetical protein                                           | 1.0  | o | o |
| Dshi_3168                                                                 | <i>apbE</i>  | ApbE family lipoprotein                                        | 23.5 | o | o |
| Dshi_3673                                                                 |              | Hypothetical protein                                           | 1.2  | o | o |
| Dshi_3708                                                                 |              | AraC-like ligand binding domain                                | -1.1 | o | o |
| Dshi_3872                                                                 |              | Hemolysin-type calcium-binding protein                         | 1.1  | o | o |

547  
548

549 **Table S3:** Comparison of the growth phenotype, fold change of gene expression after 30 min  
550 of oxygen depletion and the presence of cytoplasmic and membrane proteins under anaerobic,  
551 denitrifying conditions. In the table (2) stands for normal growth, (1) for decreased growth, (-)  
552 for no growth, (o) for not detected, (+) for detected  
553

| Locus Tag | Gene name    | Function of gene product                                    | Transposon insertion | Growth phenotype | Fold change Transcript anaerob | Presence Protein anaerob |
|-----------|--------------|-------------------------------------------------------------|----------------------|------------------|--------------------------------|--------------------------|
| Dshi_3180 | <i>nirS</i>  | Nitrite reductase precursor                                 | +                    | 2                | 31.6                           | +                        |
| Dshi_3192 |              | Hypothetical protein                                        | +                    | 2                | 14.2                           | o                        |
| Dshi_3195 | <i>nosD</i>  | Nitrous oxide maturation protein                            | +                    | 2                | 12.8                           | o                        |
| Dshi_2278 | <i>dmsA1</i> | Dimethyl sulfoxide reductase precursor                      | +                    | 2                | 11.7                           | o                        |
| Dshi_0542 |              | Phosphate transporter                                       | +                    | 2                | 8.3                            | o                        |
| Dshi_3173 | <i>nirJ</i>  | Putative nitrite reductase heme biosynthesis J protein      | +                    | 2                | 6.6                            | o                        |
| Dshi_2304 |              | Putative regulator of cell morphogenesis and NO signaling   | +                    | nD               | 6.2                            | +                        |
| Dshi_0664 | <i>fixP</i>  | Cytochrome <i>c</i> oxidase, <i>cbb3</i> -type, subunit III | +                    | 2                | 5.7                            | +                        |
| Dshi_3165 | <i>napA</i>  | Nitrate reductase catalytic subunit                         | +                    | -                | 4.4                            | +                        |
| Dshi_0543 |              | Na <sup>+</sup> /P <sub>i</sub> -cotransporter              | +                    | -                | 3.5                            | o                        |
| Dshi_3152 |              | Protein of unknown function DUF1445                         | +                    | 1                | 3.5                            | o                        |
| Dshi_1449 |              | TonB-dependent receptor                                     | +                    | nD               | 3.3                            | o                        |
| Dshi_3163 | <i>napH</i>  | Ferredoxin-type protein NapH                                | +                    | 2                | 3.2                            | o                        |
| Dshi_2233 | <i>phbC</i>  | Poly-beta-hydroxybutyrate polymerase                        | +                    | 2                | 3.1                            | +                        |
| Dshi_3558 |              | Hypothetical protein                                        | +                    | 2                | 3.1                            | +                        |
| Dshi_1968 | <i>aceE</i>  | Pyruvate dehydrogenase subunit E1                           | +                    | 2                | 3.0                            | +                        |
| Dshi_3066 | <i>atoB</i>  | Acetyl-CoA acetyltransferase                                | +                    | 2                | 2.9                            | +                        |
| Dshi_2363 | <i>ureE</i>  | UreE urease accessory domain-containing protein             | +                    | 2                | 2.7                            | o                        |
| Dshi_0432 | <i>arcA</i>  | Arginine deiminase                                          | +                    | 2                | 2.5                            | o                        |
| Dshi_3590 |              | NADH dehydrogenase (ubiquinone)                             | +                    | 2                | 2.1                            | +                        |
| Dshi_0563 | <i>irpA</i>  | Iron-regulated protein                                      | +                    | 2                | 2.1                            | +                        |
| Dshi_2052 |              | Hypothetical protein                                        | +                    | 2                | 2.1                            | o                        |
| Dshi_2966 | <i>panB</i>  | 3-Methyl-2-oxobutanoate hydroxymethyltransferase            | +                    | 2                | 2.1                            | o                        |
| Dshi_0426 |              | Hypothetical protein                                        | +                    | 2                | 2.1                            | o                        |
| Dshi_3805 | <i>phaA</i>  | NADH dehydrogenase                                          | +                    | -                | 2.0                            | +                        |
| Dshi_3249 | <i>fliE</i>  | Flagellar hook-basal body protein FliE                      | +                    | 2                | 1.9                            | o                        |
| Dshi_2965 |              | Hypothetical protein                                        | +                    | 2                | 1.8                            | o                        |
| Dshi_3553 | <i>acs</i>   | Acetate--CoA ligase                                         | +                    | 2                | 1.8                            | +                        |
| Dshi_0540 |              | NnrU family protein                                         | +                    | 2                | 1.8                            | +                        |

|           |              |                                                                                                   |   |    |      |   |
|-----------|--------------|---------------------------------------------------------------------------------------------------|---|----|------|---|
| Dshi_1399 | <i>acsA</i>  | Acetate--CoA ligase                                                                               | + | 2  | 1.8  | + |
| Dshi_0628 |              | Extracellular solute-binding protein                                                              | + | 2  | -1.8 | + |
| Dshi_3447 | <i>secB</i>  | Preprotein translocase subunit SecB                                                               | + | 2  | -1.8 | + |
| Dshi_2633 | <i>aspS</i>  | Aspartyl-tRNA synthetase                                                                          | + | 2  | -1.8 | + |
| Dshi_0008 |              | Hypothetical protein                                                                              | + | 2  | -1.8 | o |
| Dshi_1650 |              | Binding-protein-dependent transport systems inner membrane component                              | + | nD | -1.8 | + |
| Dshi_0319 | <i>bztB</i>  | Polar amino acid ABC transporter, inner membrane subunit                                          | + | 2  | -1.8 | + |
| Dshi_3397 | <i>dctP</i>  | TRAP dicarboxylate transporter- DctP subunit                                                      | + | 2  | -1.8 | o |
| Dshi_0113 | <i>ahpC</i>  | Redoxin domain-containing protein                                                                 | + | 2  | -1.9 | + |
| Dshi_1374 |              | NMT1/THI5-like domain-containing protein                                                          | + | 2  | -1.9 | + |
| Dshi_0485 |              | Hypothetical protein                                                                              | + | 2  | -1.9 | o |
| Dshi_3981 | <i>virB5</i> | Conjugal transfer protein                                                                         | + | 2  | -1.9 | + |
| Dshi_3647 |              | TrbG/VirB9/CagX                                                                                   | + | 2  | -1.9 | + |
| Dshi_0504 | <i>fdnG</i>  | Molybdopterin oxidoreductase                                                                      | + | 2  | -1.9 | + |
| Dshi_2159 | <i>pdhB</i>  | Pyruvate dehydrogenase subunit beta                                                               | + | -  | -1.9 | + |
| Dshi_0484 |              | YVTN beta-propeller repeat-containing protein                                                     | + | 2  | -2.0 | o |
| Dshi_0125 | <i>fadH</i>  | NADH:flavin oxidoreductase/NADH oxidase                                                           | + | 2  | -2.0 | + |
| Dshi_3977 | <i>virB3</i> | Hypothetical protein                                                                              | + | 2  | -2.0 | o |
| Dshi_0389 | <i>rbsC</i>  | Monosaccharide-transporting ATPase                                                                | + | nD | -2.0 | + |
| Dshi_0839 |              | Acyl-CoA dehydrogenase domain-containing protein                                                  | + | 2  | -2.0 | o |
| Dshi_3976 | <i>virB2</i> | CagE TrbE VirB component of type IV transporter system                                            | + | 2  | -2.0 | + |
| Dshi_3111 | <i>asfA</i>  | Sulfatase                                                                                         | + | 2  | -2.1 | + |
| Dshi_1404 |              | Branched-chain amino acid ABC transporter, periplasmic binding protein, putative                  | + | 2  | -2.1 | o |
| Dshi_1227 | <i>glcB</i>  | Malate synthase G                                                                                 | + | 2  | -2.1 | o |
| Dshi_1397 |              | Phospholipase/lecithinase/hemolysin-like protein                                                  | + | 2  | -2.1 | o |
| Dshi_0373 | <i>fadD</i>  | Long-chain-fatty-acid--CoA ligase                                                                 | + | 2  | -2.1 | + |
| Dshi_3326 | <i>dctP</i>  | TRAP dicarboxylate transporter, DctP subunit                                                      | + | 2  | -2.1 | o |
| Dshi_3547 | <i>cycA</i>  | Cytochrome c class I                                                                              | + | nD | -2.1 | + |
| Dshi_2342 |              | TRAP-type mannitol/chloroaromatic compound transport system small permease component-like protein | + | 2  | -2.1 | + |
| Dshi_2964 |              | Basic membrane lipoprotein                                                                        | + | 2  | -2.1 | + |
| Dshi_0476 | <i>gcd</i>   | Pyrrolo-quinoline quinone                                                                         | + | 2  | -2.1 | + |

|           |             |                                                                   |   |    |      |   |
|-----------|-------------|-------------------------------------------------------------------|---|----|------|---|
| Dshi_0506 | <i>fdnI</i> | Formate dehydrogenase, gamma subunit                              | + | 2  | -2.2 | o |
| Dshi_2661 |             | Carbon monoxide dehydrogenase subunit G                           | + | 2  | -2.2 | + |
| Dshi_2842 |             | Basic membrane lipoprotein                                        | + | 2  | -2.2 | + |
| Dshi_2617 |             | Hypothetical protein                                              | + | 2  | -2.2 | o |
| Dshi_2491 | <i>sucC</i> | Succinyl-CoA synthetase subunit beta                              | + | 2  | -2.3 | o |
| Dshi_2000 |             | D-xylose ABC transporter, periplasmic substrate-binding protein   | + | 2  | -2.3 | + |
| Dshi_0531 | <i>araF</i> | ABC sugar transporter, periplasmic ligand binding protein         | + | 2  | -2.4 | + |
| Dshi_0974 |             | Extracellular solute-binding protein                              | + | 2  | -2.4 | + |
| Dshi_3877 | <i>thiC</i> | Thiamine biosynthesis protein ThiC                                | + | 2  | -2.4 | + |
| Dshi_3681 |             |                                                                   |   |    |      |   |
| Dshi_1652 |             | Extracellular solute-binding protein                              | + | 2  | -2.4 | + |
| Dshi_0378 |             | Hypothetical protein                                              | + | 2  | -2.5 | + |
| Dshi_2081 |             | Cytochrome <i>c</i> class I                                       | + | 2  | -2.5 | o |
| Dshi_1590 |             | Membrane protein involved in aromatic hydrocarbon degradation     | + | 2  | -2.7 | + |
| Dshi_0872 |             | Extracellular solute-binding protein                              | + | 2  | -2.8 | + |
| Dshi_1144 | <i>ctaE</i> | Cytochrome <i>c</i> oxidase subunit III                           | + | 2  | -2.9 | o |
| Dshi_2659 | <i>coxL</i> | Aldehyde oxidase and xanthine dehydrogenase molybdopterin binding | + | 2  | -3.0 | + |
| Dshi_0390 | <i>rbsB</i> | Periplasmic binding protein/LacI transcriptional regulator        | + | 2  | -3.1 | + |
| Dshi_0547 | <i>ugpB</i> | Extracellular solute-binding protein                              | + | nD | -4.2 | + |
| Dshi_1140 | <i>ctaC</i> | Cytochrome <i>c</i> oxidase subunit II                            | + | 2  | -4.2 | + |
| Dshi_1195 |             | TRAP transporter solute receptor TAXI family protein              | + | -  | -4.8 | + |
| Dshi_1194 |             | TRAP transporter, 4TM/12TM fusion protein                         | + | 2  | -5.1 | + |
